# Supplementary material
Source: MDPI journal article supplement (https://www.mdpi.com/1999-4907/8/1/22)
Supplement: s1 [file s1]

Supplementary Materials: Spatial Genetic Structure within and among Seed Stands of *Pinus engelmannii* Carr. and *Pinus leiophylla* Schiede ex Schltdl. & Cham, in Durango, Mexico

**María Elena Ortiz-Olivas, José Ciro Hernández-Díaz, Matthias Fladung, Álvaro Cañadas-López, José Ángel Prieto-Ruíz and Christian Wehenkel**

**Table S1.** Analysis of fine-scale with GenAlex and SPAGeDi in seven seed stands of *Pinus engelmannii* and nine seed stands of *P. leiophilla* by considering a distance class width of 150 m, 999 bootstraps or 999 permutations and a 99% confidence interval. The genetic distance of Huff (GD) was calculated using GenAlEx 6.501. The pairwise kinship coefficient (Fij) was calculated using SPAGeDi 1.4.

| **GenAlex(r)** | | | | **SPAGeDi** | | |
| --- | --- | --- | --- | --- | --- | --- |
| **Code** | **GD** | **P(r) < (−CI)** | **P(r) > (+CI)** | **Fij** | **P(Fij) < (−CI)** | **P(Fij) > (+CI)** |
| PE-LI | 60.8 | 0.991 (300–450) | 0.991 (150–300) | −0.03400 | 0.994 (300–450) | 0.992 (150–300) |
| PE-MM | 72.9 | 0.786 (300–450) | 0.699 (0–150) | −0.04067 | 0.788 (300–450) | 0.692 (0–150) |
| PE-MP | 64.5 | 0.905 (450–600) | 0.936 (0–150) | −0.02265 | 0.866 (450–600) | 0.933 (90–180) |
| PE-MP2 | 67.2 | 0.968 (450–600) | 0.906 (0–150) | −0.03047 | 0.959 (450–600) | 0.911 (0–150) |
| PE-MP3 | 74.2 | 0.914 (450–600) | 0.917 (150–300) | −0.02870 | 0.904 (450–600) | 0.946 (150–300) |
| PE-MP4 | 66.3 | 0.751 (450–600) | 0.882 (300–450) | −0.03789 | 0.796 (450–600) | 0.880 (300–450) |
| PE-MV | 69.6 | 0.865 (450–600) | 0.982 (0–150) | −0.03722 | 0.879 (450–600) | 0.999 (0–150) |
| PL-BE | 74.8 | 0.976 (300–450) | 0.862 (450–600) | −0.04025 | 0.975 (300–450) | 0.880 (450–600) |
| PL-C2 | 74.2 | 0.888 (300–450) | 0.928 (0–150) | −0.03178 | 0.888 (300–450) | 0.942 (0–150) |
| PL-CO | 68.5 | 0.988 (300–450) | 0.972 (0–150) | −0.02663 | 0.983 (300–450) | 0.978 (0–150) |
| PL-M | 70.4 | 0.993 (300–450) | 0.991 (0–150) | −0.02700 | 0.994 (300–450) | 0.991 (150–300) |
| PL-MC | 79.0 | 0.893 (150–300) | 0.966 (0–150) | −0.03397 | 0.903 (150–300) | 0.960 (0–150) |
| PL-PA | 78.0 | 0.922 (150–300) | 0.987 (600–750) | −0.02534 | 0.892 (150–300) | 0.991 (600–750) |
| PL-PO | 83.9 | 0.976 (0–150) | 0.970 (150–300) | −0.02992 | 0.962 (0–150) | 0.975 (150–300) |
| PL-RAN | 75.5 | 0.859 (300–450) | 0.693 (150–300) | −0.03119 | 0.864 (300–450) | 0.718 (150–300) |
| PL-TS | 71.1 | 0.939 (600–750) | 0.888 (1050–1200) | −0.03023 | 0.934 (600–750) | 0.872 (1050–1200) |

Note: GD = Genetic distance, r = correlation coefficient, Fij = kinship coefficient P = probability of autocorrelation, CI = confidence interval. P(r) < (−CI) and P(r) > (+CI) and P(Fij) < (−CI) and P(Fij) > (+CI), highest probability of autocorrelation in each stand, showing the distance class (m) where it was found. For definitions of the stand codes, see Table 1 in the paper.

**Table S2.** Analysis of spatial genetic structure among seven *Pinus engelmannii* seed stands by considering a distance class width of 160 m in the northern stands and 24 km in the southern stands, 999 bootstraps and permutations and a 99% confidence interval. The genetic distance of Huff (GD) was calculated using GenAlEx 6.501, and the pairwise kinship coefficient (Fij) was calculated using SPAGeDi 1.4.

|  | **GenAlex (r)** | | | **SPAGeDi (Fij)** | | |
| --- | --- | --- | --- | --- | --- | --- |
| **Code** | **GD** | **P(r) < (−CI)** | **P(r) > (+CI)** | **Fij** | **P(Fij) < (−CI)** | **P(Fij) > (+CI)** |
| NORTH | 70.4 | 0.9999 (480–640) + 0.9999 (640–800) + 0.9999 (800–960) + | 0.9999 (0–160) + 0.9999 (160–320) + | −0.0046 | 0.9999 (480–640) + 0.9999 (640–800) + 0.9999 (800–960) + | 0.9999 (0–160) + 0.9999 (160–320) + |
| SOUTH | 67.3 | 0.9999 (24–48) + | 0.9999 (0–24) + | −0.0258 | 0.9999 (24–48) + | 0.9999 (0–24) + |

Note: GD = Genetic distance, Fij = kinship coefficient, r = correlation coefficient, CI = confidence interval, P(r) < (−CI) and P(r) > (+ CI) and and P(Fij) < (−CI) and P(Fij) > (+CI), highest probability of autocorrelation in each stand, showing the distance class (km) where it was found; + indicates a significant difference after Bonferroni correction.

**Table S3.** Analysis of large-scale spatial genetic structure in nine seed stands of *Pinus leiophylla* by considering a distance class width of 8 km in the stands, 999 bootstraps or 999 permutations and a 99% confidence interval. The genetic distance of Huff (GD) was calculated using GenAlEx 6.501, and the pairwise kinship coefficient (Fij) was calculated using SPAGeDi 1.4.

|  | **GenAlex (r)** | | | **SPAGeDi (Fij)** | | |
| --- | --- | --- | --- | --- | --- | --- |
| **Code** | **GD** | **P(r) < (−CI)** | **P(r) > (+CI)** | **Fij** | **P(Fij) < (−CI)** | **P(Fij) > (+CI)** |
| NORTH | 82.84 | 0.9999 (8–16) + 0.9999 (24–32) + | 0.9999 (0–8) + | −0.0243 | 0.9999 (8–16) + 0.9999 (24–32) + | 0.9999 (0–8) + |
| SOUTH | 75.81 | 0.9999 (8–16) + | 0.9999 (0–8) + | 0.0068 | 0.9999 (0–8) + | 0.9999 (8–16) + 0.9999 (16–24) + |

Note: P = probability of autocorrelation, CI = confidence interval, GD = genetic distance, Fij = kinship coefficient, r = correlation coefficient, + indicates a significant difference after Bonferroni correction.


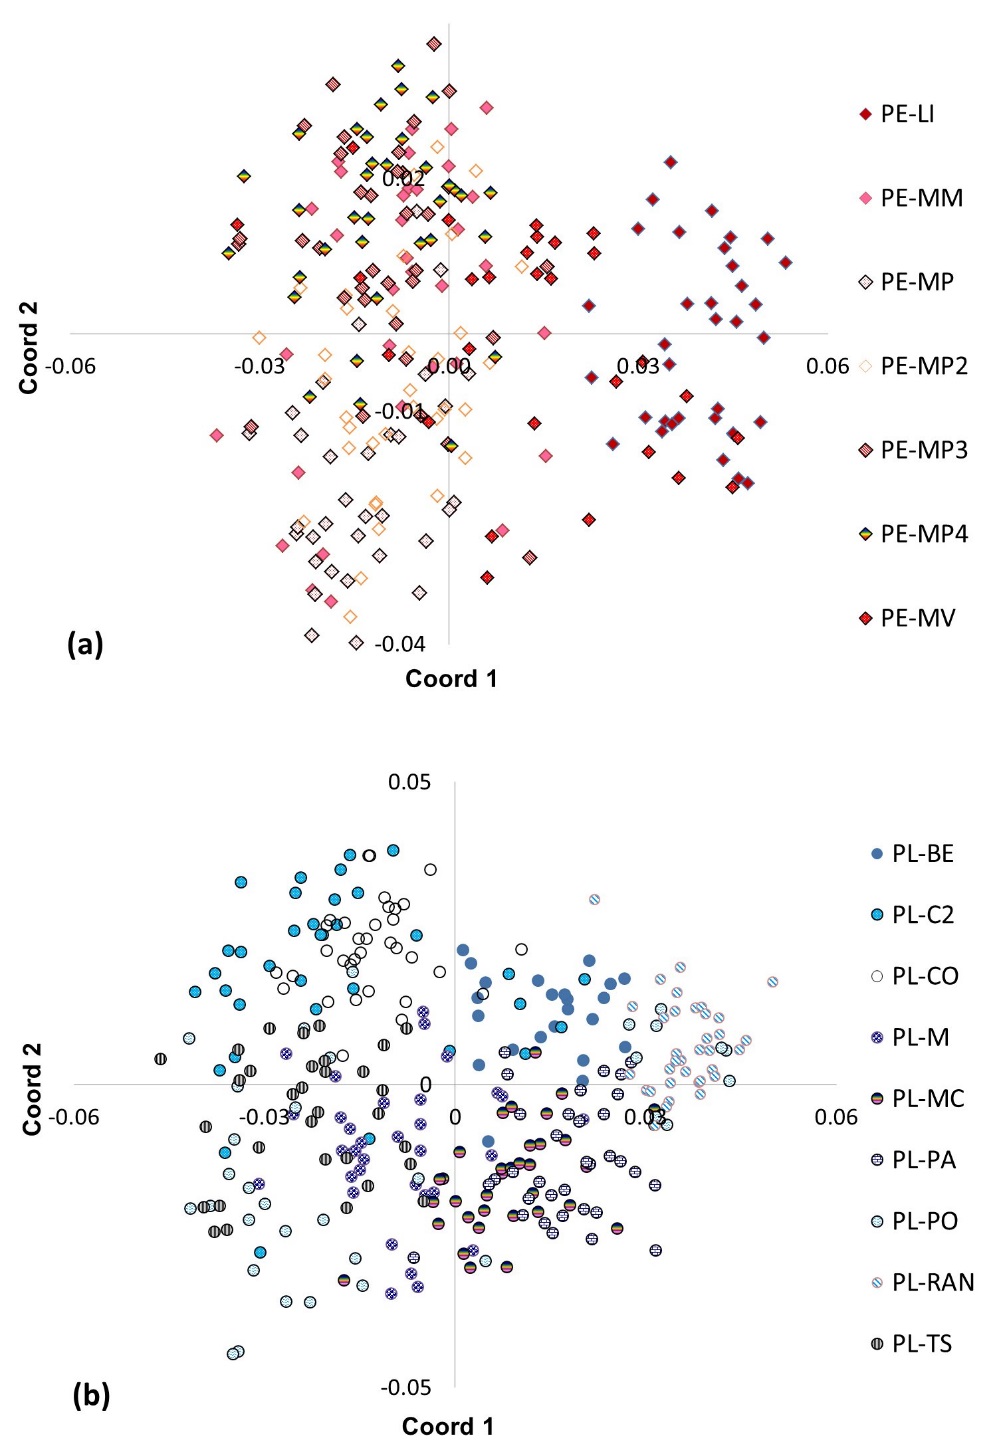


**Figure S1.** Results of Principal Coordinates Analysis (*PCoA*) of the individual *Pinus engelmannii* (**a**)and *Pinus leiophylla* trees (**b**). The first two coordinates together explained 11.01% and 11.48%, respectively, of the variation in AFLP. For definitions of the stand codes, see in caption of Figure 5 in the paper.
